# Supplementary material for: Clinical impact of subclonal EGFR T790M mutations in advanced-stage EGFR-mutant non-small-cell lung cancers
Source: PubMed Central journal article supplement (PMC7979775; doi:10.1038/s41467-021-22057-8), 2021-03-19
Supplement: 41467_2021_22057_MOESM1_ESM.pdf [file 41467_2021_22057_MOESM1_ESM.pdf]

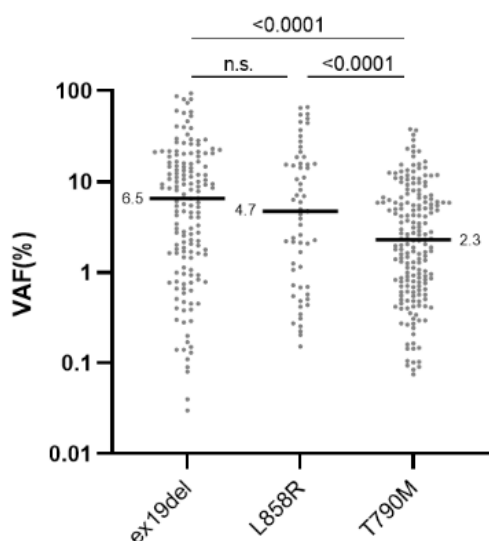

Supplementary Fig. 1: Distribution of EGFR ex19del, L858R or T790M VAFs detectable in baseline plasma cfDNA by next-generation sequencing. Lines represent the median VAF values. P value for comparison between ex19del and L858R VAF values was determined by Mann Whitney test. n.s., not significant ( $P=0.6687$ ). Different method has been used for the remaining two comparisons, ex19del versus T790M VAFs and L858R versus T790M VAFs, due to group dependences. A random effects model was fitted to  $\log_{10}(\text{VAF})$  separately for each of the above 2 comparisons, by including mutation type as a fixed effect and patient as a random effect in the model. The two-sided p-values corresponding to testing for a difference in the  $\log_{10}(\text{VAF})$  LS-means between the mutation types are presented. The normality assumptions of the model were also met.

Vaclova *et al*: Clinical impact of subclonal EGFR T790M mutations in advanced-stage EGFR-mutant lung cancers

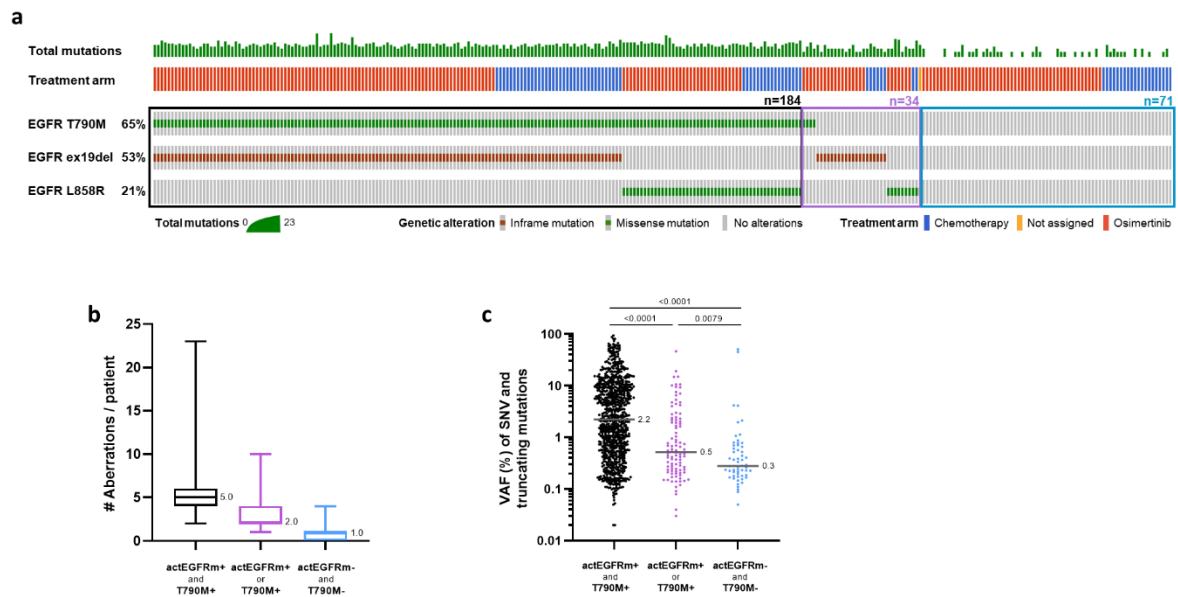

Supplementary Fig. 2: Analysis of ctDNA mutation shedding by baseline plasma NGS among different EGFR mutation shedding groups. (a) Oncoprint showing concurrent EGFR alterations detected in 289 AURA3 patients. A total number of detectable alterations per patient is shown in a histogram at the top of the oncoprint. Three EGFR shedding groups are specified: Patients positive for both activating EGFR mutation (actEGFRm) and T790M are marked by a black rectangle, patients with only actEGFRm or T790M detectable in baseline plasma are marked by a purple rectangle, patients with none of the EGFR mutations (EGFR nonshedders) are marked by a blue rectangle. (b) Median number of detectable genomic aberrations (SNVs, indels, fusions, amplifications) in the 73 tested genes per patient in the three EGFR shedding groups. The box-whisker graph shows a minimum (upper whisker), maximum (lower whisker), median (middle line; value shown) and 25th and 75th percentiles (box). (c) Median VAF values of non-synonymous SNVs and truncating mutations (indels, fusions) detected in patients from the three EGFR shedding groups. 37 out of 71 (52%) EGFR non-shedders had at least 1 detectable non-synonymous SNV, indel or fusion. Line

Vaclova *et al*: Clinical impact of subclonal EGFR T790M mutations in advanced-stage EGFR-mutant lung cancers

represents the median VAF of detectable aberrations. P value was determined by the Mann Whitney test, two-sided.

Vaclova *et al*: Clinical impact of subclonal EGFR T790M mutations in advanced-stage EGFR-mutant lung cancers

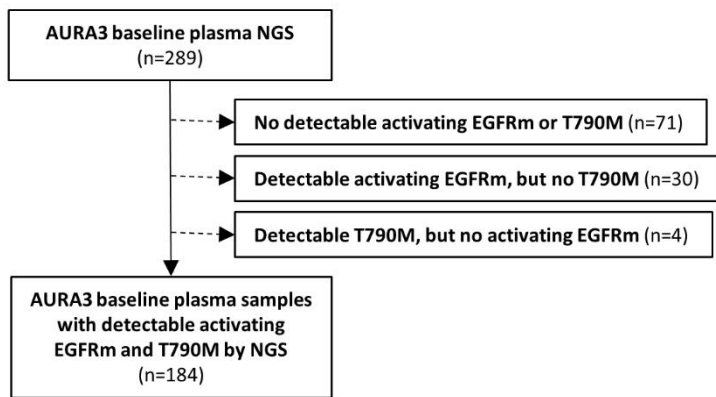

Supplementary Fig. 3: Patient plasma sample selection for T790M subclonality analysis.

Patients from both treatment arms, osimertinib 80mg and chemotherapy, have been included in the T790M subclonality evaluation.

Vaclova *et al*: Clinical impact of subclonal EGFR T790M mutations in advanced-stage EGFR-mutant lung cancers

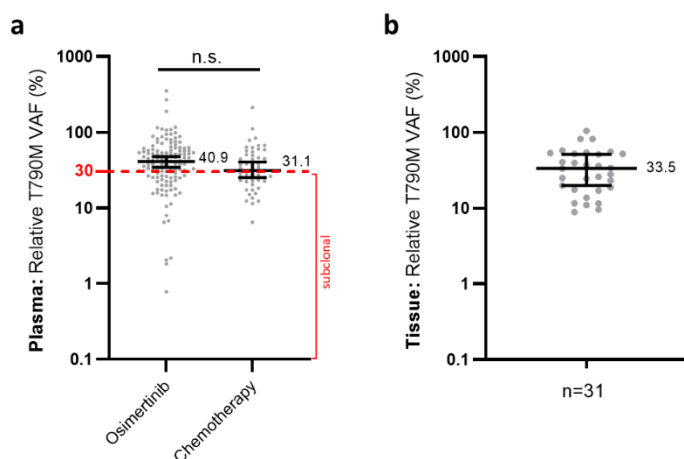

Supplementary Fig. 4: Distribution of relative T790M VAF in plasma and tumour samples.

(a) Relative T790M VAF values in a selection of 131 osimertinib-treated and 53 chemotherapy-treated patients. The median relative T790M VAF value is 40.9% and 31.1% in the osimertinib and chemotherapy treatment arms, respectively. Black line represents median, ticks mark 95% CI; red dashed line marks the 30% T790M subclonality threshold. P value determined by Mann Whitney test,  $P=0.0606$ ; n.s., not significant. (b) Distribution of relative T790M VAF in 31 tumour (=tissue) samples. The relative T790M VAF values were calculated as described for plasma (details in Methods). Black line represents median (33.5%), ticks mark 95% CI.

Vaclova *et al*: Clinical impact of subclonal EGFR T790M mutations in advanced-stage EGFR-mutant lung cancers

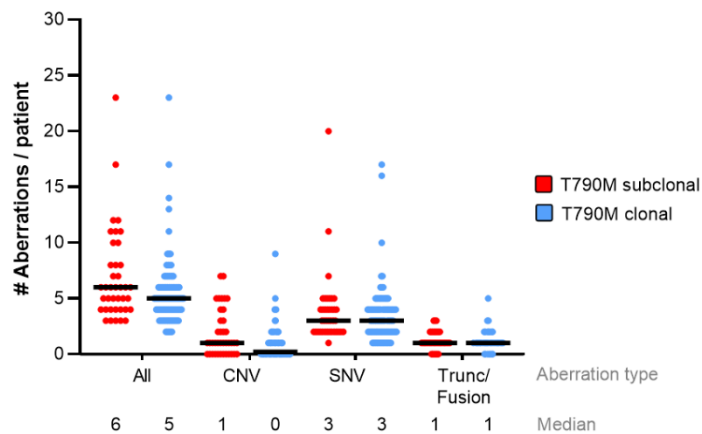

Supplementary Fig. 5: Number of non-synonymous aberrations detected in baseline plasmas by a cfDNA assay in T790M subclonal (red) and clonal (blue) groups. CNV, copy number variants; SNV, single-nucleotide variants; Trunc/Fusion, truncating/fusion variants. Among the CNV category, only amplifications have been detected using the clinically validated NGS-based cfDNA assay. Black line indicates median.

Vaclova *et al*: Clinical impact of subclonal EGFR T790M mutations in advanced-stage EGFR-mutant lung cancers

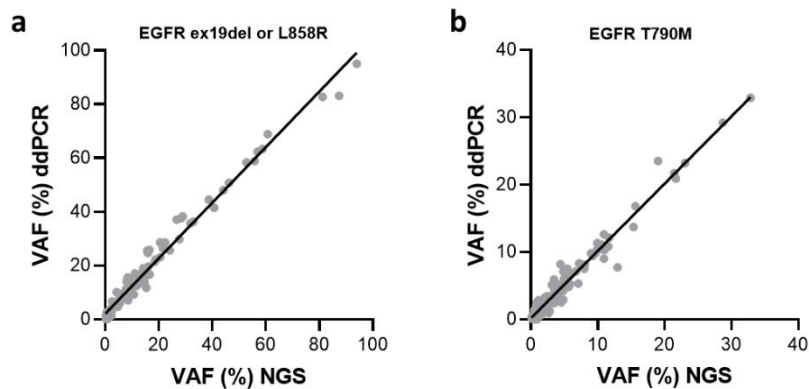

Supplementary Fig. 6: Correlation between EGFR mutation VAFs detected in baseline plasma by the ddPCR and NGS assay platforms. Values for the EGFR ex19del/L858R (a) and the EGFR T790M VAF (b) obtained by the two assay platforms are plotted. Data from 104 AURA3 patients assessed in Figure 4 were included (patients with ddPCR data from at least two of the three studied timepoints, including 31 patients with subclonal and 73 patients with clonal T790M previously assessed by NGS).

Vaclova *et al*: Clinical impact of subclonal EGFR T790M mutations in advanced-stage EGFR-mutant lung cancers

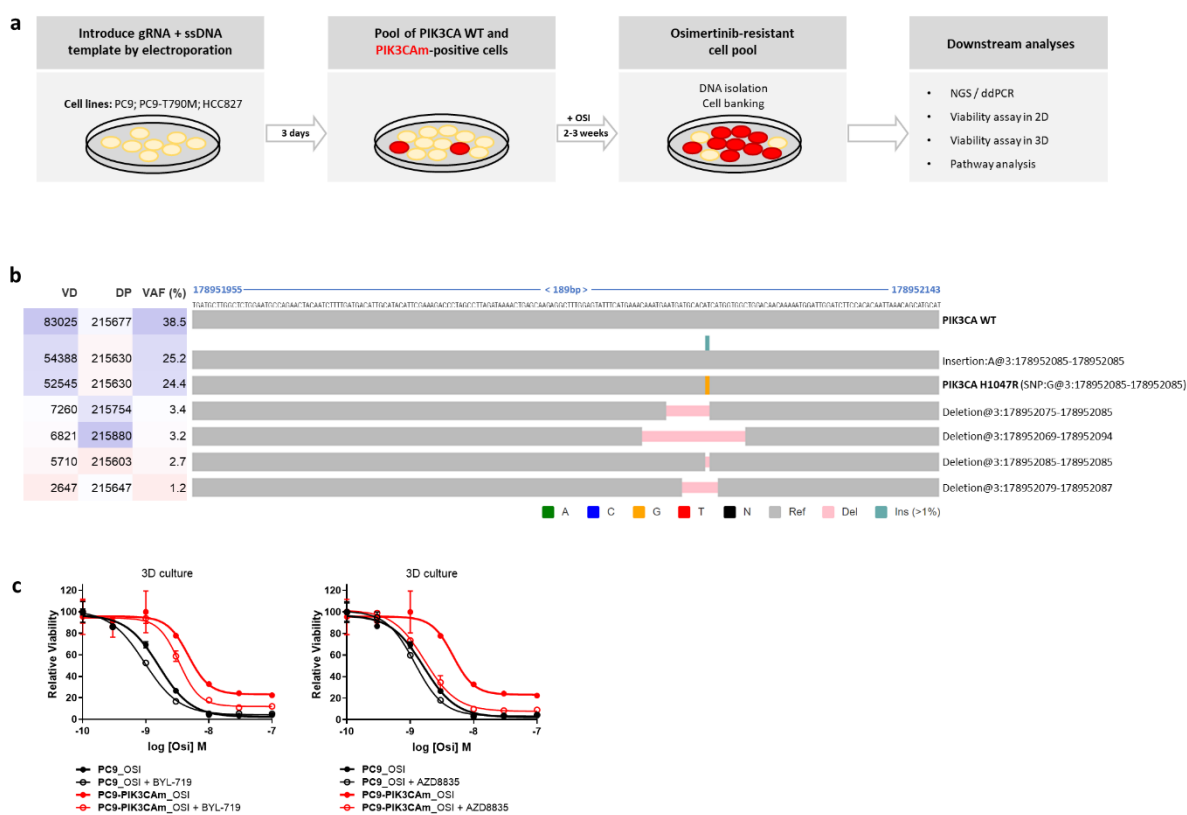

Supplementary Fig. 7: In vitro validation of PIK3CA H1047R as a driver of resistance to osimertinib in EGFR-mutant lung cancer cell lines. (a) CRISPR/Cas9-mediated genomic knock-in (KI) of PIK3CA H1047R to understand its contribution as a driver of resistance to osimertinib (details in the Methods section). (b) Frequency of individual variants in a PIK3CA amplicon detected by NGS of the PC9-PIK3CA-H1047R CRISPR cell pool after 3 weeks of osimertinib treatment. NGS revealed PIK3CA H1047R at VAF=24.4% and numerous small insertions/deletions, a common feature of CRISPR knock-in experiment due to a high rate of an imprecise repair by the non-homologous end joining (NHEJ) pathway. Only variants with VAF>1% are shown. VD, variant depth; DP, read depth; VAF (%), variant allele frequency [%]; Ref, reference sequence; Del, deletion; Ins, insertion. (c) Effect of osimertinib and 500nM PI3K inhibitor (BYL-719 on the left, AZD8835 on the right) co-



Vaclova *et al*: Clinical impact of subclonal EGFR T790M mutations in advanced-stage EGFR-mutant lung cancers

treatment in the PIK3CA H1047R mutant cell pool and WT PC9 cells grown in 3D spheroid culture. Representative experiments from three independent repeats are shown, error bars represent mean  $\pm$  SD from replicate wells. Source data are provided as a Source Data file.

Vaclova *et al*: Clinical impact of subclonal EGFR T790M mutations in advanced-stage EGFR-mutant lung cancers

Supplementary Table 1: Guardant360 sequencing panel (G360; 73 genes).

| Gene        | SNVs | Indels | Amplifications | Fusions |
|-------------|------|--------|----------------|---------|
| AKT1        | yes  |        |                |         |
| ALK         | yes  |        |                | yes     |
| APC         | yes  | yes    |                |         |
| AR          | yes  |        | yes            |         |
| ARAF        | yes  |        |                |         |
| ARID1A      | yes  | yes    |                |         |
| ATM         | yes  | yes    |                |         |
| BRAF        | yes  |        | yes            |         |
| BRCA1       | yes  | yes    |                |         |
| BRCA2       | yes  | yes    |                |         |
| CCND1       | yes  |        | yes            |         |
| CCND2       | yes  |        | yes            |         |
| CCNE1       | yes  |        | yes            |         |
| CDH1        | yes  | yes    |                |         |
| CDK4        | yes  |        | yes            |         |
| CDK6        | yes  |        | yes            |         |
| CDKN2A      | yes  | yes    |                |         |
| CTNNB1      | yes  |        |                |         |
| DDR2        | yes  |        |                |         |
| EGFR        | yes  | yes    | yes            |         |
| ERBB2       | yes  | yes    | yes            |         |
| ESR1        | yes  |        |                |         |
| EZH2        | yes  |        |                |         |
| FBXW7       | yes  |        |                |         |
| FGFR1       | yes  |        | yes            |         |
| FGFR2       | yes  |        | yes            | yes     |
| FGFR3       | yes  |        |                | yes     |
| GATA3       | yes  | yes    |                |         |
| GNA11       | yes  |        |                |         |
| GNAQ        | yes  |        |                |         |
| GNAS        | yes  |        |                |         |
| HNF1A       | yes  |        |                |         |
| HRAS        | yes  |        |                |         |
| IDH1        | yes  |        |                |         |
| IDH2        | yes  |        |                |         |
| JAK2        | yes  |        |                |         |
| JAK3        | yes  |        |                |         |
| KIT         | yes  | yes    | yes            |         |
| KRAS        | yes  |        | yes            |         |
| MAP2K1/MEK1 | yes  |        |                |         |
| MAP2K2/MEK2 | yes  |        |                |         |
| MAPK1/ERK2  | yes  |        |                |         |
| MAPK3/ERK1  | yes  |        |                |         |
| MET         | yes  | yes    | yes            |         |
| MLH1        | yes  | yes    |                |         |
| MPL         | yes  |        |                |         |
| MTOR        | yes  | yes    |                |         |
| MYC         | yes  |        | yes            |         |
| NF1         | yes  | yes    |                |         |
| NFE2L2      | yes  |        |                |         |
| NOTCH1      | yes  |        |                |         |
| NPM1        | yes  |        |                |         |
| NRAS        | yes  |        |                |         |
| NTRK1       | yes  |        |                | yes     |
| NTRK3       | yes  |        |                |         |

Vaclova *et al*: Clinical impact of subclonal EGFR T790M mutations in advanced-stage EGFR-mutant lung cancers

|        |     |     |     |     |
|--------|-----|-----|-----|-----|
| PDGFRA | yes | yes | yes |     |
| PIK3CA | yes |     | yes |     |
| PTEN   | yes | yes |     |     |
| PTPN11 | yes |     |     |     |
| RAF1   | yes |     | yes |     |
| RB1    | yes | yes |     |     |
| RET    | yes |     |     | yes |
| RHEB   | yes |     |     |     |
| RHOA   | yes |     |     |     |
| RIT1   | yes |     |     |     |
| ROS1   | yes |     |     | yes |
| SMAD4  | yes | yes |     |     |
| SMO    | yes |     |     |     |
| STK11  | yes | yes |     |     |
| TERT   | yes |     |     |     |
| TP53   | yes | yes |     |     |
| TSC1   | yes | yes |     |     |
| VHL    | yes | yes |     |     |

Vaclova *et al*: Clinical impact of subclonal EGFR T790M mutations in advanced-stage EGFR-mutant lung cancers

Supplementary Table 2: Demographic characteristics within T790M subclonal and clonal groups stratified by treatment arm.

| Demographic characteristic |                                           | Clonal [a]         |                     | Sub-clonal [a]     |                     | Total (N=184) |
|----------------------------|-------------------------------------------|--------------------|---------------------|--------------------|---------------------|---------------|
|                            |                                           | Osimertinib (N=92) | Chemotherapy (N=27) | Osimertinib (N=39) | Chemotherapy (N=26) |               |
| Age (years)                | n                                         | 92                 | 27                  | 39                 | 26                  | 184           |
|                            | Mean                                      | 61.2               | 63.1                | 59.3               | 59                  | 60.7          |
|                            | SD                                        | 12.46              | 12.64               | 11.79              | 13.28               | 12.44         |
|                            | Median                                    | 62                 | 67                  | 58                 | 60                  | 62            |
|                            | Min                                       | 25                 | 33                  | 36                 | 20                  | 20            |
|                            | Max                                       | 82                 | 80                  | 82                 | 80                  | 82            |
| Age group (years), n (%)   | <50                                       | 16 (17.4)          | 5 (18.5)            | 7 (17.9)           | 6 (23.1)            | 34 (18.5)     |
|                            | >=50-<65                                  | 38 (41.3)          | 7 (25.9)            | 19 (48.7)          | 12 (46.2)           | 76 (41.3)     |
|                            | >=65-<75                                  | 21 (22.8)          | 11 (40.7)           | 9 (23.1)           | 3 (11.5)            | 44 (23.9)     |
|                            | >=75                                      | 17 (18.5)          | 4 (14.8)            | 4 (10.3)           | 5 (19.2)            | 30 (16.3)     |
| Sex, n (%)                 | Male                                      | 34 (37.0)          | 7 (25.9)            | 14 (35.9)          | 7 (26.9)            | 62 (33.7)     |
|                            | Female                                    | 58 (63.0)          | 20 (74.1)           | 25 (64.1)          | 19 (73.1)           | 122 (66.3)    |
| Race, n (%)                | White                                     | 37 (40.2)          | 9 (33.3)            | 18 (46.2)          | 10 (38.5)           | 74 (40.2)     |
|                            | Black or African American                 | 3 ( 3.3)           | 0                   | 0                  | 0                   | 3 ( 1.6)      |
|                            | Asian                                     | 51 (55.4)          | 18 (66.7)           | 19 (48.7)          | 16 (61.5)           | 104 (56.5)    |
|                            | Native Hawaiian or other Pacific Islander | 0                  | 0                   | 0                  | 0                   | 0             |
|                            | American Indian or Alaska Native          | 0                  | 0                   | 0                  | 0                   | 0             |
|                            | Other                                     | 1 ( 1.1)           | 0                   | 2 ( 5.1)           | 0                   | 3 ( 1.6)      |
| Smoking status, n (%)      | Never                                     | 60 (65.2)          | 16 (59.3)           | 27 (69.2)          | 21 (80.8)           | 124 (67.4)    |
|                            | Current                                   | 5 ( 5.4)           | 1 ( 3.7)            | 3 ( 7.7)           | 0                   | 9 ( 4.9)      |
|                            | Former                                    | 27 (29.3)          | 10 (37.0)           | 9 (23.1)           | 5 (19.2)            | 51 (27.7)     |

[a] If a patient with the relative T790M VAF greater than 30% then the patient will be in subgroup of 'clonal' otherwise the patient will be in subgroup of 'subclonal'.

Vaclova *et al*: Clinical impact of subclonal EGFR T790M mutations in advanced-stage EGFR-mutant lung cancers

Supplementary Table 3: Comparisons for demographic characteristics between T790M subclonal and T790M clonal subgroups of AURA3 patients.

| Demographic characteristic |                | Clonal [a]<br>(N=119) | Sub-clonal [a]<br>(N=65) | 2-sided p-value [b] |
|----------------------------|----------------|-----------------------|--------------------------|---------------------|
| Age group (years), n (%)   | <65            | 66 (55.5)             | 44 (67.7)                | 0.1058              |
|                            | >=65           | 53 (44.5)             | 21 (32.3)                |                     |
| Sex, n (%)                 | Male           | 41 (34.5)             | 21 (32.3)                | 0.7685              |
|                            | Female         | 78 (65.5)             | 44 (67.7)                |                     |
| Race, n (%)                | Asian          | 69 (58.0)             | 35 (53.8)                | 0.5884              |
|                            | Non-Asian      | 50 (42.0)             | 30 (46.2)                |                     |
| Smoking status, n (%)      | Never          | 76 (63.9)             | 48 (73.8)                | 0.1675              |
|                            | Current/Former | 43 (36.1)             | 17 (26.2)                |                     |

[a] If a patient with the relative T790M VAF greater than 30% then the patient will be in subgroup of 'clonal' otherwise the patient will be in subgroup of 'subclonal'.

[b] 2-sided p-value is based on Chi-square test for the comparisons. Statistical comparison is based on the non-missing values.

Vaclova *et al*: Clinical impact of subclonal EGFR T790M mutations in advanced-stage EGFR-mutant lung cancers

Supplementary Table 4: List of pathways and genes included in the GH360 panel and known to be involved in TKI-resistance. RTK, receptor tyrosine kinase.

| Pathway                         | Gene      | Alteration                                  |
|---------------------------------|-----------|---------------------------------------------|
| PI3K                            | PIK3CA    | oncogenic mutations and gene amplifications |
|                                 | PTEN      | oncogenic mutations                         |
| RTK (bypass pathway activation) | ERBB2 amp | gene amplifications                         |
|                                 | FGFR1 amp | gene amplifications                         |
|                                 | MET amp   | gene amplifications                         |
| MAPK                            | NF1       | oncogenic mutations                         |
|                                 | KRAS      | oncogenic mutations                         |
|                                 | BRAF      | oncogenic mutations                         |
|                                 | MAP2K1    | oncogenic mutations                         |
| Cell cycle                      | CCNE1 amp | gene amplifications                         |
|                                 | CCND2 amp | gene amplifications                         |
|                                 | CCND1 amp | gene amplifications                         |
|                                 | CDK6 amp  | gene amplifications                         |
|                                 | CDKN2A    | oncogenic mutations                         |
|                                 | CDK4 amp  | gene amplifications                         |

Vaclova *et al*: Clinical impact of subclonal EGFR T790M mutations in advanced-stage EGFR-mutant lung cancers

Supplementary Table 5: List of pathogenic alterations in genes known to be involved in TKI resistance presented in Figure 3C.

| GENE   | PROTEIN CHANGE          | CDS CHANGE                        |
|--------|-------------------------|-----------------------------------|
| BRAF   | amp                     | amp                               |
| BRAF   | N581S                   | c.1742A>G                         |
| CCND1  | amp                     | amp                               |
| CCND2  | amp                     | amp                               |
| CCNE1  | amp                     | amp                               |
| CDK4   | amp                     | amp                               |
| CDK6   | amp                     | amp                               |
| CDKN2A | C72*                    | c.216C>A                          |
| CDKN2A | R80*                    | c.238C>T                          |
| CDKN2A | p.Glu27fs               | c.77dupA                          |
| CDKN2A | p.Ala4_Pro11del         | c.9_32delGGCGGCGGGGAGCAGCATGGAGCC |
| ERBB2  | amp                     | amp                               |
| FGFR1  | amp                     | amp                               |
| KRAS   | amp                     | amp                               |
| MAP2K1 | P124L                   | c.371C>T                          |
| MET    | amp                     | amp                               |
| NF1    | p.Asp424fs              | c.1270_1286delGATTGGTGGCCTAAGAT   |
| NF1    | R461Q                   | c.1382G>A                         |
| NF1    | H501Y                   | c.1501C>T                         |
| NF1    | p.Tyr80fs               | c.237dupA                         |
| NF1    | N1054D                  | c.3160A>G                         |
| NF1    | V1242G                  | c.3725T>G                         |
| NF1    | K1283R                  | c.3848A>G                         |
| NF1    | p.Glu2339fs             | c.7014delT                        |
| NF1    | D2375N                  | c.7123G>A                         |
| NF1    | p.Lys2422fs             | c.7246_7264dupCTACTAACTCTGGTTAACA |
| PIK3CA | amp                     | amp                               |
| PIK3CA | N345K                   | c.1035T>A                         |
| PIK3CA | E542K                   | c.1624G>A                         |
| PIK3CA | E545K                   | c.1633G>A                         |
| PIK3CA | Q546E                   | c.1636C>G                         |
| PIK3CA | M1043I                  | c.3129G>C                         |
| PIK3CA | H1047Y                  | c.3139C>T                         |
| PIK3CA | H1047R                  | c.3140A>G                         |
| PTEN   | R130Q                   | c.389G>A                          |
| PTEN   | p.Arg172fs              | c.514_523delAGGCGCTATG            |
| PTEN   | Y225*                   | c.675T>G                          |
| PTEN   | p.Asp236fs              | c.705delA                         |
| PTEN   | splice acceptor variant | c.802-2A>T                        |

\* amp reported if copy number above 2

Vaclova *et al*: Clinical impact of subclonal EGFR T790M mutations in advanced-stage EGFR-mutant lung cancers

Supplementary Table 6: Primers/probes details. Adapter sequences for binding indexing primers are shown in capitals in the amplicon NGS primers.

| Application  | Primer/probe | Primer/probe name | Sequence                                                              |
|--------------|--------------|-------------------|-----------------------------------------------------------------------|
| amplicon NGS | primer       | PIK3CA_F          | TCGTCGGCAGCGTCAGATGTGTATAAGAGACAGGt <sup>g</sup> atgcttggctctggaatgc  |
| amplicon NGS | primer       | PIK3CA_R          | GTCTCGTGGGCTCGGAGATGTGTATAAGAGACAGTg <sup>c</sup> atgctgtttaattgtggaa |
| ddPCR        | primer       | PIK3CA H1047R_F   | TCGAAAGACCCTAGCCTTAGA                                                 |
| ddPCR        | primer       | PIK3CA H1047R_R   | TGTGTGGAAGATCCAATCCAT                                                 |
| ddPCR        | probe        | PIK3CA H1047R_WT  | /5HEX/TG+CA+C+A+T+CAT+GG/3IBFQ/                                       |
| ddPCR        | probe        | PIK3CA H1047R_mut | /5-6FAM/TG+CA+C+G+TCA+TG/3IBFQ/                                       |
| ddPCR        | primer       | EGFR T790M_F      | CATCTGCCTCACCTCCAC                                                    |
| ddPCR        | primer       | EGFR T790M_R      | TCTTTGTGTCCCGGACATAG                                                  |
| ddPCR        | probe        | EGFR T790M_WT     | /5HEX/CA+TC+A+C+GC+A+GC/3IABkFQ/                                      |
| ddPCR        | probe        | EGFR T790M_mut    | /5-6FAM/TCA+TC+A+T+GC+A+GC/3IABkFQ/                                   |



Vaclova *et al*: Clinical impact of subclonal EGFR T790M mutations in advanced-stage EGFR-mutant lung cancers

Supplementary Table 7: Amplicon sequencing summary.

| <b>Sample</b>     | <b>Chromosome</b> | <b>Start</b> | <b>Stop</b> | <b>#Reads</b> | <b>#Aligned</b> | <b>%Aligned</b> |
|-------------------|-------------------|--------------|-------------|---------------|-----------------|-----------------|
| PC9               | 3                 | 178951955    | 178952143   | 247378        | 246728          | 99.737          |
| PC9-PIK3CA-H1047R | 3                 | 178951955    | 178952143   | 228567        | 227833          | 99.679          |
